# Supplementary material for: Photocatalytic reforming of glycerol for H2 evolution on Pt/TiO2: fundamental understanding the effect of co-catalyst Pt and the Pt deposition route
Source: Royal Society of Chemistry journal article supplement (doi:10.1039/c4ta06052k), 2014-12-01

## Supporting information

**Fig. S1** (a) Survey and high resolution XPS spectra of (b) Ti2p, O1s.

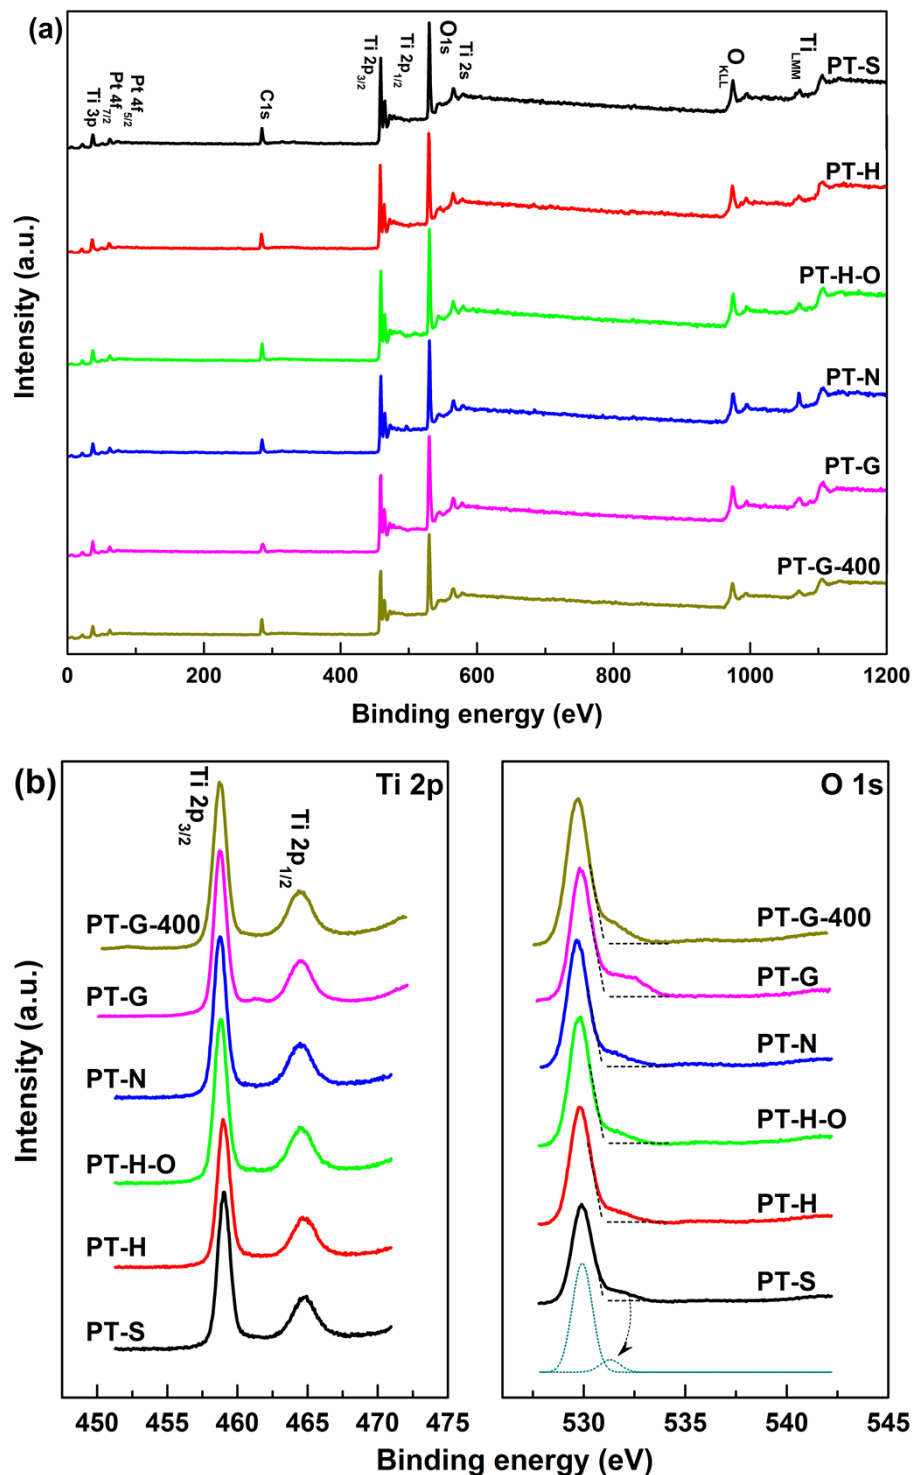

**Fig. S2** The BET transform plots of  $1/Q[(P_0/P)-1]$  versus  $P/P_0$ .

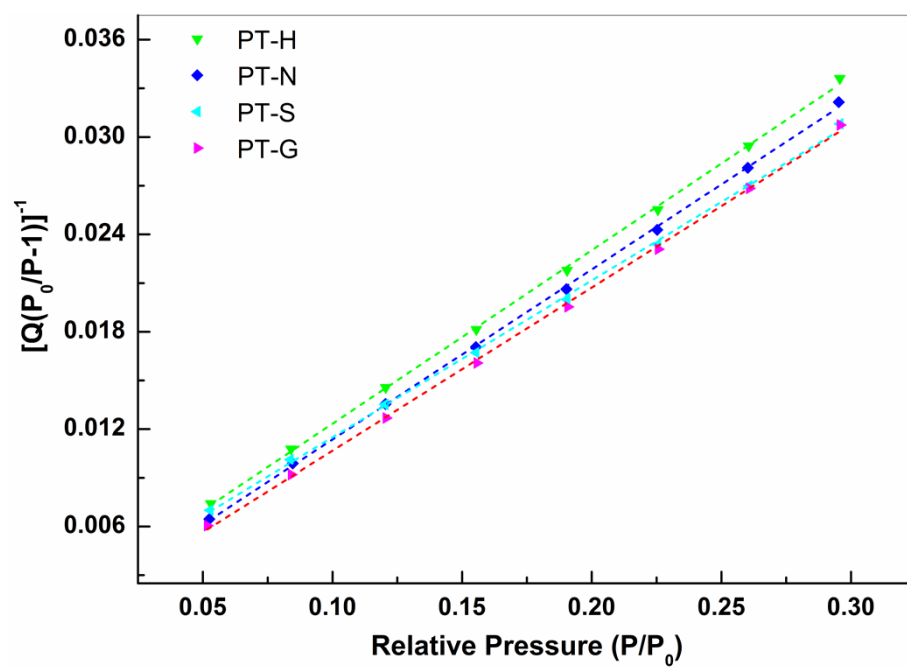

**Fig. S3** PR of glycerol solution for H<sub>2</sub> evolution: photocatalyst, 300mg PT-S; solution, 0.01mL glycerol dissolved in 155 mL water.

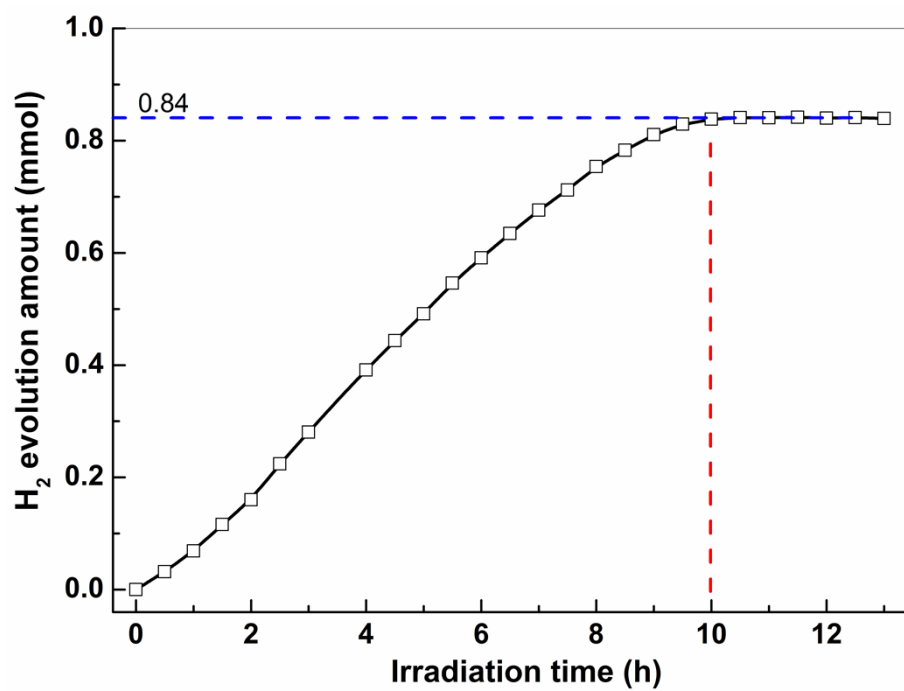

**Fig. S4** The change of the reaction solution pH during PR of glycerol over PT-S.

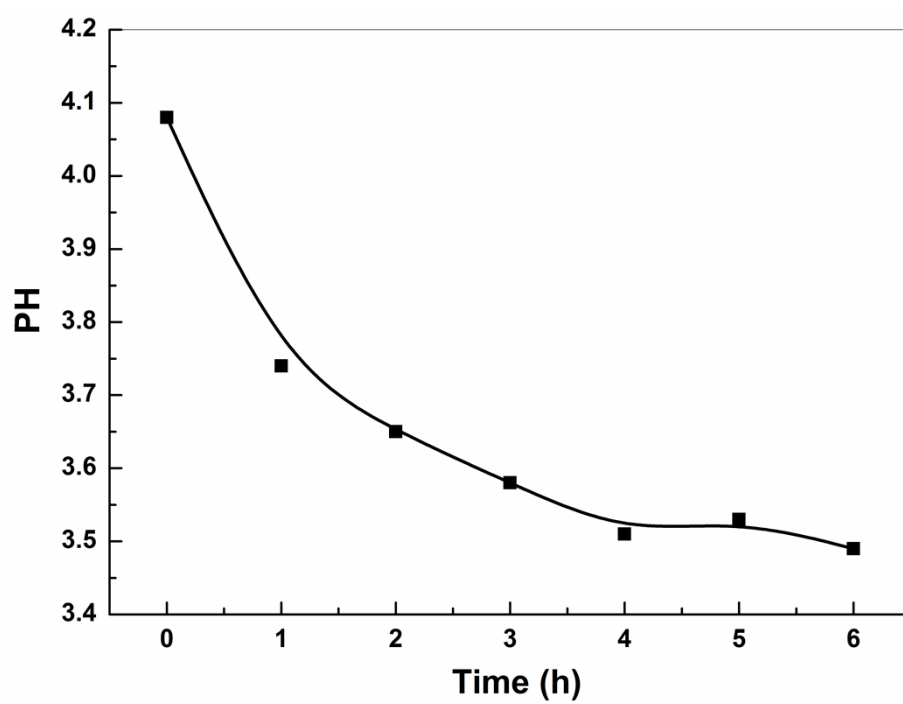

Supplement: c4ta06052k1.pdf [file c4ta06052k1.pdf]
